# Cue-induced striatal dopamine release in Parkinson's disease-associated impulsive-compulsive behaviours

Sean S. O'Sullivan,<sup>1,2</sup> Kit Wu,<sup>2</sup> Marios Politis,<sup>2</sup> Andrew D. Lawrence,<sup>3</sup> Andrew H. Evans,<sup>4</sup> Subrata K. Bose,<sup>2</sup> Atbin Djamshidian,<sup>1</sup> Andrew J. Lees<sup>1</sup> and Paola Piccini<sup>2</sup>

1 Reta Lila Weston Institute of Neurological Studies, University College London, London WC1N 1PJ, UK

2 Centre for Neuroscience, Division of Experimental Medicine and MRC Clinical Sciences Centre, Faculty of Medicine, Hammersmith Hospital, Imperial College London, London, W12 0HS, UK

3 School of Psychology, Cardiff University, Cardiff CF10 3AT, UK

4 Department of Neurology, Royal Melbourne Hospital, Victoria, VIC 3052, Australia

Correspondence to: Dr Sean O'Sullivan,  
Reta Lila Weston Institute of Neurological Studies,  
University College London, London WC1N 1PJ, UK  
E-mail: sosulliv@ion.ucl.ac.uk

**Impulsive-compulsive behaviours are a significant source of morbidity for patients with Parkinson's disease receiving dopaminergic therapy. The development of these behaviours may reflect sensitization of the neural response to non-drug rewards, similar to that proposed for sensitization to drug rewards in addiction. Here, by using <sup>11</sup>C-raclopride positron emission tomography imaging, we investigated the effects of reward-related cues and L-dopa challenge in patients with Parkinson's disease with and without impulsive-compulsive behaviours on striatal levels of synaptic dopamine. Eighteen patients (11 with and seven without impulsive-compulsive behaviours) underwent three <sup>11</sup>C-raclopride positron emission tomography scans. The impulsive-compulsive behaviours included hypersexuality, binge eating, punting, compulsive use of dopamine replacement therapy, compulsive buying and pathological gambling, with eight patients exhibiting more than one impulsive-compulsive behaviour. There were no significant differences in baseline dopamine D2 receptor availability between the Parkinson's disease groups. No differences were found when comparing the percentage change of raclopride binding potential between the two Parkinson's disease groups following L-dopa challenge with neutral cues. The group with Parkinson's disease with impulsive-compulsive behaviours had a greater reduction of ventral striatum <sup>11</sup>C-raclopride binding potential following reward-related cue exposure, relative to neutral cue exposure, following L-dopa challenge (16.3% compared with 5.8% in Parkinson's disease controls,  $P = 0.016$ ). The heightened response of striatal reward circuitry to heterogeneous reward-related visual cues among a group of patients with different impulsive-compulsive behaviours is consistent with a global sensitization to appetitive behaviours with dopaminergic therapy in vulnerable individuals. Our findings are relevant for the broader debate on the relation between impulsive-compulsive behaviours and addictions and may have important implications with regards to advertisement legislation in an effort to prevent the onset of behavioural addictions.**

**Keywords:** Parkinson's disease; impulse control disorders; addiction; functional imaging; impulsivity

**Abbreviation:** BP<sub>ND</sub> = binding potential (non-displaceable)

## Introduction

Impulsive-compulsive behaviours are an increasingly well-recognized adverse effect of dopaminergic medications used to treat Parkinson's disease. Impulsive-compulsive behaviours include the Diagnostic and Statistical Manual of Mental Disorders-IV impulse control disorder of pathological gambling, plus the putative impulse control disorders compulsive sexual behaviour, compulsive buying and binge eating (Grant, 2008), together with punding and the addiction-like compulsive use of dopamine replacement therapy, or dopamine dysregulation syndrome (Giovannoni *et al.*, 2000; Evans *et al.*, 2004). The prevalence of impulsive-compulsive behaviours was ~14% in a large ( $n = 3031$ ) study undertaken in specialist movement disorder clinics (Weintraub *et al.*, 2010). Dopamine dysregulation syndrome is more associated with compulsive L-dopa use (O'Sullivan *et al.*, 2009), whereas other impulsive-compulsive behaviours are more linked with oral dopamine agonist use (Gallagher *et al.*, 2007; Weintraub *et al.*, 2010). The correlation between impulsive-compulsive behaviours and dopamine agonist dose is relatively weak, indicating that patients with Parkinson's disease and impulsive-compulsive behaviours have specific neurobiological vulnerabilities to the behavioural side-effects of these medications.

In a previous study (Evans *et al.*, 2006), we found that individuals with dopamine dysregulation syndrome showed an enhanced ventral striatal response to L-dopa, which was correlated with increased motivation to take the drug. This finding was consistent with the incentive sensitization theory of compulsive drug use, which posits that compulsive drug use arises from the excessive attribution of incentive salience or 'wanting' for drug rewards and their cues, due to progressive neuroadaptations in dopamine projections to ventral striatal motivation circuitry (Robinson and Berridge, 1993; Berridge *et al.*, 2009). In animal models, sensitization of ventral striatal circuitry by addictive drugs has been shown to enhance the pursuit of even natural rewards, including food and sexual incentives (Fiorino and Phillips, 1999; Nocjar and Panksepp, 2002), as a result of excessive incentive salience attribution to reward cues (Wyvell and Berridge, 2001). Such sensitized 'wanting' is greatly magnified by acute administration of dopaminergic drugs (Wyvell and Berridge, 2001). An important finding is that individual propensities for certain types of reward become selectively intensified, enhancing drug-seeking in some animals, while enhancing sexual pursuit, food-seeking or other appetitive behaviours in others (Nocjar and Panksepp, 2002). An enhanced incentive salience attribution to pre potent reward cues, especially in 'ON' dopaminergic states, could therefore lead to the compulsive pursuit of different rewards and may underpin the protean phenomenology of impulsive-compulsive behaviours in Parkinson's disease (Lawrence *et al.*, 2003; Berridge, 2007).

In this study, we investigate possible ventral striatal sensitization across a broad spectrum of Parkinson's disease associated impulsive-compulsive behaviours in relation to L-dopa and reward cues. We hypothesized that patients with impulsive-compulsive behaviours would demonstrate sensitization of their ventral striatal circuitry in response to diverse visual cues relating to reward. We further predicted that craving for non-drug rewards

would be related to L-dopa induced-striatal dopamine release and be responsive to reward-related visual cues.

## Materials and methods

### Patients

Eighteen L-dopa treated patients diagnosed with Parkinson's disease according to the Queen Square Brain Bank for Neurological Disorders clinical criteria underwent positron emission tomography (PET) scanning (Hughes *et al.*, 1992). All were assessed by the first author for the presence of impulsive-compulsive behaviours in a semi-structured interview, using proposed criteria (Lawrence *et al.*, 2003; Evans *et al.*, 2004; Voon and Fox, 2007; Grant, 2008). Eleven patients were identified as having impulsive-compulsive behaviours (Parkinson's disease with impulsive-compulsive behaviours) at the time of scanning, with eight exhibiting more than one impulsive-compulsive behaviour. The behaviours included compulsive sexual behaviour ( $n = 5$ ), binge eating disorder ( $n = 5$ ), punding ( $n = 5$ ), dopamine dysregulation syndrome ( $n = 5$ ), compulsive buying ( $n = 5$ ), pathological gambling ( $n = 5$ ) and reckless generosity ( $n = 1$ ). The four patients with dopamine dysregulation syndrome and punding also exhibited other impulsive-compulsive behaviours. All participants gave informed written consent in accordance with the Declaration of Helsinki and the study received ethical approval from the Hammersmith, Queen Charlotte's and Chelsea research ethics committee. Permission to administer  $^{11}\text{C}$ -raclopride was obtained from the Administration of Radioactive Substances Advisory Committee (ARSAC) of the Department of Health, UK.

Patients were screened using the Mini-Mental State Examination and those scoring  $<26$  were excluded because of the requirement to complete self-report scales. Calculation of a daily L-dopa equivalent dose for each patient was based on theoretical equivalence of dopamine agonists to L-dopa (Evans *et al.*, 2004). After a clinic appointment, patients completed the Brief Sensation Seeking Scale-4 (Stephenson *et al.*, 2003), which consists of four questions regarding sensation seeking behaviours. The scale is reliable and has predictive value in alcohol, tobacco and other substance abuse (Stephenson *et al.*, 2003). Heightened impulsive sensation seeking has previously been found in a number of impulsive-compulsive behaviours (Lejoyeux *et al.*, 1998), and prospectively predicts development of impulsive-compulsive behaviours and addiction (Sher *et al.*, 2000; Cyders and Smith, 2008).

### $^{11}\text{C}$ -raclopride positron emission tomography scanning

All participants underwent three  $^{11}\text{C}$ -raclopride PET scans on separate mornings after overnight drug withdrawal (at least 12 h) to study the effects of the pharmacological challenge and exposure to reward-related cues on endogenous dopamine levels. Patients were instructed not to eat from 11 p.m. the evening before each scan to control for state of hunger.  $^{11}\text{C}$ -Raclopride is a specific D2 receptor radioligand, which binds receptors in competition with endogenous dopamine. Reductions in  $^{11}\text{C}$ -raclopride binding potential ( $\text{BP}_{\text{ND}}$ ) are considered an indirect measure of increased endogenous dopamine release, and this technique is well established in the Parkinson's disease and addiction functional imaging literature (Brooks and Piccini, 2006). One scan consisted of the patient 'OFF' medications, looking at neutral cues throughout the scanning. These images included landscapes and nature scenes, household objects and random patterns. Another scan consisted of patients being shown the same set of neutral cues after receiving

an oral dose of dispersible L-dopa/benserazide 200/50 mg 45 min prior to the scan starting. A third scan consisted of reward-related cues being shown to patients after receiving an oral dose of dispersible L-dopa/benserazide 200/50 mg 45 min prior to the scan starting.

We chose to look at response to reward cues as excessive reward pursuit following drug-induced sensitization, which is thought to result from excessive incentive salience attribution to reward cues (Wyvell and Berridge, 2001) and the design minimized cognitive and motor demands. Further, heightened cue reactivity has been reported not just in drug addiction (Carter and Tiffany, 1999), but in a number of impulsive-compulsive behaviours in the non-Parkinson's disease population, including pathological gambling (Sodano and Wulfert, 2010), compulsive buying (Youn and Faber, 2000) and binge eating (Sobik *et al.*, 2005).

The reward-related cues included equal proportions of those of appetizing foods, sexually themed pictures, gambling and money- and shopping-related images and pictures of familiar dopamine replacement therapies. The majority of neutral and reward-related cues were obtained from the well-validated International Affective Picture System (Lang *et al.*, 2008) and were supplemented by freely available images obtained from the internet. The variation of reward-related cue themes was used for several reasons. First, given ethical limitations on radiation exposure, we wanted to be able to sample as many distinct classes of impulsive-compulsive behaviour-related reward cues as possible (food, sex, drug cues, etc.). Second, we wanted to reduce habituation effects as sensitized responses are influenced by novelty (Crombag and Robinson, 2004). Third, there is evidence that cue reactivity is not necessarily focused on a single reward but can 'spill-over' to other rewards (Sodano and Wulfert, 2010), and several patients showed more than one impulsive-compulsive behaviour, consistent with the known comorbidity between impulsive-compulsive behaviours (Petry *et al.*, 2005; Grant, 2008; Kessler *et al.*, 2008; Yip *et al.*, 2010).

The order of the scanning conditions was randomized for each patient. All images were presented as a PowerPoint™ (Microsoft) presentation on a screen placed diagonally above patients' full field of view as they lay in the scanner. The picture presentation started 2 min prior to bolus injection of <sup>11</sup>C-raclopride and ran continuously until the end of the scan (60 min). Each image remained on the screen for 10 s. A total of 370 images were shown, without repetition. To control for levels of attention in participants, a 'rating slide' was shown at 10 pseudo-random intervals in all scans, and patients were asked to rate how much they liked the last slide seen into a recording dictaphone, using a scale of 1 (not at all) to 5 (extremely liked).

The PET data were acquired on an ECAT HR+ 962 scanner (CTI/Siemens) in 3D mode, with an axial field of view of 15.5 cm. A 10 min transmission scan (with a <sup>137</sup>Cs rotating point source) was performed before each emission scan for scatter and attenuation correction (Watson *et al.*, 1996). Head movement was monitored and minimised using a light head-strap. A mean dose of 256 MBq ( $\pm 1.90$  MBq SEM) was administered as an intravenous bolus over 10 s. Dynamic data were collected over 60 min as 20 timeframes. <sup>11</sup>C-Raclopride was manufactured and supplied by GE Healthcare.

## Assessments on days of positron emission tomography scanning

Participants undergoing PET scanning were asked to rate their drug and non-drug cravings on a visual analogue scale, anchored between 'the lowest ever' and 'the most ever'. Questions included: 'How do you rate your food cravings right now?'; 'How do you rate your libido/sex drive right now?'; 'How do you rate your desire to

gamble right now?'; 'How much do you like the effects of your medications?'; and 'How much do you feel you would like more of the medication?'. Similar single-item craving scales have been shown to be as reliable as longer several-item questionnaires (West and Ussher, 2010). Motor disability was assessed in a baseline 'OFF' medication state with the Unified Parkinson's disease Rating Scale part 3 and then again immediately before scanning to ensure patient has responded to the medication.

These assessments were performed in the morning before PET scanning or L-dopa administration, and then repeated immediately after the PET scan.

## Analysis

The dynamic images were first summed to produce an ADD image. This consists of the integrated total emission data obtained from the whole brain between the start and finish of the 20 timeframes. The ADD image and region of interest object map was normalized to a <sup>11</sup>C-raclopride template which was on Montreal Neurological Institute space by using statistical parametric mapping software (SPM2; Wellcome Department of Cognitive Neurology, London). Regional time activity curves for the caudate, putamen, ventral striatum and cerebellum were obtained by defining regions of interest on normalised PET images. For each patient, the average left and right caudate, putamen and ventral striatum binding potential (BP<sub>ND</sub>) reflecting  $B_{\max}/K_d$  were calculated using simplified reference tissue model with the cerebellum as a reference region; (Lammertsma and Hume, 1996; Gunn *et al.*, 1997).

Percentage change in <sup>11</sup>C-raclopride BP<sub>ND</sub> related to the L-dopa challenge scan was calculated using the formula:  $100 \times [(BP_{ND} \text{ value of 'OFF' L-dopa scan with neutral cues}) - (BP_{ND} \text{ value of 'ON' L-dopa scan with neutral cues})] / (BP \text{ value of 'OFF' L-dopa scan with neutral cues})$ . Percentage change in <sup>11</sup>C-raclopride BP<sub>ND</sub> related to reward cues was calculated using the formula:  $100 \times [(BP_{ND} \text{ value of 'ON' L-dopa scan with neutral cues}) - (BP_{ND} \text{ value of 'ON' L-dopa scan with rewarding cues})] / (BP \text{ value of 'ON' L-dopa scan with neutral cues})$ .

Percentage change in motor Unified Parkinson's Disease Rating Scale scores was calculated as follows:  $100 \times [(value \text{ when 'OFF' L-dopa}) - (value \text{ when 'ON' L-dopa})] / (value \text{ when 'OFF' L-dopa})$ . The percentage change in craving scores following various scan types was calculated as follows:  $100 \times [(value \text{ after scan and L-dopa if relevant to that scan type}) - (value \text{ before scan and L-dopa if relevant to that scan type})] / (value \text{ before scan and L-dopa if relevant to that scan type})$ .

Statistical analysis was performed using SPSS Version 16, SPSS Inc., Chicago, IL, USA. Medians/means were compared using Mann–Whitney U-test or Student 2-tailed *t*-tests where appropriate. Kolmogorov–Smirnov tests were undertaken to demonstrate that the data were normally distributed. Effect sizes for group differences were calculated using Cohen's *d*. Univariate correlations between percentage change in <sup>11</sup>C-raclopride BP<sub>ND</sub> and variables such as sensation-seeking scores, percentage changes in cravings were made using Spearman's rho correlation tests separately on each Parkinson's disease group.

## Results

### Patients

Eighteen patients with Parkinson's disease (11 Parkinson's disease with impulsive-compulsive behaviours, seven Parkinson's disease

without impulsive-compulsive behaviours) who underwent PET scanning are described in Table 1. The patients without impulsive-compulsive behaviours were taking more dopamine agonists than the group with impulsive-compulsive behaviours at the time of scanning because of the need to discontinue agonists as part of the treatment of impulsive-compulsive behaviours. Apart from this, the groups were matched in terms of total daily dopamine replacement therapy used, age, gender, Unified Parkinson's disease rating scale measures and Parkinson's disease history.

# Comparisons of absolute <sup>11</sup>C-raclopride binding levels and percentage change between scans

Using the *a priori* defined dorsal and ventral striatal regions of interest, we found no significant differences in the 'OFF medication + neutral images' scan baseline <sup>11</sup>C-raclopride-BP<sub>ND</sub> between the Parkinson's disease groups (Table 2).

No differences were found when comparing the percentage change of <sup>11</sup>C-raclopride-BP<sub>ND</sub> between the two Parkinson's disease groups following a L-dopa challenge when viewing neutral cues. The group of patients with impulsive-compulsive behaviours had a greater reduction of ventral striatum <sup>11</sup>C-raclopride-BP<sub>ND</sub> following the 'reward images' scan, relative to the neutral cue scan, when 'ON' medication ( $t = -2.7$ ,  $P = 0.016$ , Cohen's  $d = 1.37$ ,  $r = 0.56$ ). (See Table 3 and Fig. 1B and C for the percentage changes in <sup>11</sup>C-raclopride-BP<sub>ND</sub> following L-dopa challenge or reward cue exposure and Fig. 2 for representative changes in <sup>11</sup>C-raclopride-BP<sub>ND</sub> between Parkinson's disease groups). Excluding the four patients with dopamine dysregulation syndrome from analyses did not affect the differences between the other patients with Parkinson's disease with impulsive-compulsive behaviour and Parkinson's disease without impulsive-compulsive behaviour controls, with the seven remaining patients with Parkinson's disease with impulsive-compulsive behaviour

showing a greater reduction of ventral striatum <sup>11</sup>C-raclopride-BP<sub>ND</sub> following the reward-related cues than the neutral scan, when on drug,  $P = 0.011$ .

# Clinical assessments and craving measurements during positron emission tomography scanning

No differences were found between groups comparing absolute measures and percentage changes of self-reported cravings for medication, gambling, libido or food following L-dopa challenge or exposure to reward-related imagery. No differences were seen either between groups or between cue types (reward versus neutral) regarding the rating of how much they liked the particular images seen (data not shown). The rates of completing these ratings was similar between groups, with >90% response to the rating slides.

# Correlations between psychological assessments, craving measures and change in <sup>11</sup>C-raclopride binding potentials between scan types

No correlations were found between sensation seeking measures and the percentage change in <sup>11</sup>C-raclopride-BP<sub>ND</sub> of the three brain regions analysed following a L-dopa challenge with neutral images. No changes in measures of craving were found to correlate with changes on PET scanning, either in relation to L-dopa challenge or exposure to reward-related cues.

Sensation seeking measures positively correlated with percentage change in <sup>11</sup>C-raclopride BP<sub>ND</sub> seen in the putamen (Spearman's correlation coefficient = 0.68,  $P = 0.022$ ), and caudate (Spearman's correlation coefficient = 0.65,  $P = 0.03$ ) following exposure to reward-related cues among patients with Parkinson's disease with impulsive-compulsive behaviour. No correlations were found between sensation seeking and <sup>11</sup>C-raclopride-BP<sub>ND</sub>

**Table 1** Clinical and psychological data

|                                             | Parkinson's disease without ICB | Parkinson's disease with ICB | Statistical test                   |
|---------------------------------------------|---------------------------------|------------------------------|------------------------------------|
| <i>n</i> (%)                                | 7 (39)                          | 11 (61)                      |                                    |
| Age (years)                                 | 57.7 ± 10.5                     | 57.1 ± 7.7                   | $t = 0.1$ , $P = 0.9$              |
| Gender (male:female)                        | 5:2                             | 8:3                          | Chi sq = 0.95, $P = 1.0$           |
| Age of Parkinson's disease onset            | 47.0 ± 8.8                      | 45.1 ± 11.2                  | $t = 0.4$ , $P = 0.7$              |
| Parkinson's disease duration                | 10.7 ± 6.4                      | 11.9 ± 11.3                  | $t = -0.3$ , $P = 0.8$             |
| L-dopa (mg/day)                             | 708 ± 319                       | 636 ± 325                    | $t = 0.5$ , $P = 0.7$              |
| DA LED (mg/day)                             | 241 ± 143                       | 62 ± 92                      | Mann-Whitney U = 10.5, $P = 0.007$ |
| Total dopamine replacement therapy (mg/day) | 949 ± 253                       | 698 ± 337                    | $t = 1.8$ , $P = 0.09$             |
| UPDRS OFF medication                        | 37.4 ± 11.4                     | 43.3 ± 10.6                  | $t = -1.1$ , $P = 0.3$             |
| UPDRS ON medication                         | 22.0 ± 8.2                      | 24.1 ± 9.3                   | $t = -0.5$ , $P = 0.6$             |
| Percentage UPDRS change post-L-dopa         | 42.2 ± 4.5                      | 46.1 ± 14.0                  | $t = -0.9$ , $P = 0.4$             |
| Sensation seeking                           | 10.3 ± 2.0                      | 12.6 ± 2.7                   | $t = -1.9$ , $P = 0.08$            |

All values are mean ± SD. Comparisons are made using Student's *t*-test, except for Mann-Whitney U and Chi-square analyses where indicated. DA LED = daily L-dopa equivalent dose of dopamine agonists; ICB = impulsive-compulsive behaviour; UPDRS = Unified Parkinson's disease Rating Scale.

**Table 2** Absolute levels of  $^{11}\text{C}$ -raclopride binding potential comparative data

|                                                    | Parkinson's disease without ICB | Parkinson's disease with ICB | Statistical test     |
|----------------------------------------------------|---------------------------------|------------------------------|----------------------|
| OFF + neutral images                               |                                 |                              |                      |
| Mean caudate raclopride binding potential          | $2.0 \pm 0.47$                  | $1.73 \pm 0.36$              | $t = -1.2, P = 0.25$ |
| Mean putamen raclopride binding potential          | $2.66 \pm 0.65$                 | $2.24 \pm 0.36$              | $t = -1.7, P = 0.1$  |
| Mean ventral striatum raclopride binding potential | $2.16 \pm 0.55$                 | $1.89 \pm 0.4$               | $t = -1.2, P = 0.2$  |
| ON + neutral images                                |                                 |                              |                      |
| Mean caudate raclopride binding potential          | $1.89 \pm 0.44$                 | $1.57 \pm 0.26$              | $t = -1.8, P = 0.1$  |
| Mean putamen raclopride binding potential          | $2.4 \pm 0.55$                  | $1.96 \pm 0.32$              | $t = -1.9, P = 0.08$ |
| Mean ventral striatum raclopride binding potential | $1.83 \pm 0.44$                 | $1.56 \pm 0.31$              | $t = -1.4, P = 0.17$ |
| ON + reward images                                 |                                 |                              |                      |
| Mean caudate raclopride binding potential          | $1.73 \pm 0.37$                 | $1.5 \pm 0.21$               | $t = -1.6, P = 0.14$ |
| Mean putamen raclopride binding potential          | $2.2 \pm 0.47$                  | $1.89 \pm 0.3$               | $t = -1.5, P = 0.15$ |
| Mean ventral striatum raclopride binding potential | $1.52 \pm 0.32$                 | $1.46 \pm 0.27$              | $t = -0.4, P = 0.7$  |

All values are mean  $\pm$  SD. Comparisons are made using Student's *t*-test.  
ICB = impulsive-compulsive behaviour.

**Table 3** Percentage changes in  $^{11}\text{C}$ -raclopride binding potentials across scan types

|                                         | Parkinson's disease without ICB | Parkinson's disease with ICB | Statistical test      |
|-----------------------------------------|---------------------------------|------------------------------|-----------------------|
| OFF neutral–ON neutral                  |                                 |                              |                       |
| Mean caudate percent reduction          | $3.5 \pm 3.5$                   | $8.4 \pm 7.0$                | $t = 2.0, P = 0.061$  |
| Mean putamen percent reduction          | $9.2 \pm 6.7$                   | $12.4 \pm 6.2$               | $t = 1.0, P = 0.3$    |
| Mean ventral striatum percent reduction | $14.4 \pm 10.6$                 | $16.8 \pm 9.4$               | $t = 0.5, P = 0.6$    |
| ON neutral – ON reward                  |                                 |                              |                       |
| Mean caudate percent reduction          | $8.2 \pm 7.1$                   | $4.5 \pm 4.7$                | $t = -1.2, P = 0.25$  |
| Mean putamen percent reduction          | $7.8 \pm 8.0$                   | $3.6 \pm 2.9$                | $t = -1.3, P = 0.2$   |
| Mean ventral striatum percent reduction | $16.3 \pm 9.3$                  | $5.8 \pm 5.6$                | $t = -2.7, P = 0.016$ |

All values are mean  $\pm$  SD. Comparisons are made using Student's *t*-test.  
ICB = impulsive-compulsive behaviour.

in the Parkinson's disease without impulsive-compulsive behaviour group.

## Discussion

A range of impulse control and related 'disinhibitory' or compulsive disorders has been linked to dopamine therapies in Parkinson's disease. The central role of dopaminergic drug therapy in these disorders (Weintraub *et al.*, 2010) suggests that they may be different manifestations of the same underlying causal mechanism, but what this mechanism is remains unclear. This is the first study to use visual cues to investigate dopamine release in the striatum of non-substance addicted participants. Here, we show that medicated patients with Parkinson's disease with impulsive-compulsive behaviour exhibit greater decrease in ventral striatal  $^{11}\text{C}$ -raclopride BP<sub>ND</sub>, i.e. enhanced dopamine release, than patients with Parkinson's disease without impulsive-compulsive behaviour following exposure to a variety of reward-related cues, but not to L-dopa challenge alone.

While debate continues over the precise role of mesolimbic dopamine systems in reward, one prominent theory (Berridge, 2007) holds that dopamine motivates the pursuit of rewards by

attributing incentive salience to reward-related stimuli, triggering pursuit ('wanting'). Further, in the case of compulsive behavioural disorders, including addiction, reward cues may be attributed with pathological incentive salience (Robinson and Berridge, 2008). Our results are consistent with this hypothesis, showing exaggerated ventral striatal dopamine release to reward cues in medicated patients with Parkinson's disease with a variety of impulsive-compulsive behaviours in the absence of differences in hedonic ratings of the images themselves.

The Parkinson's disease with impulsive-compulsive behaviour group was heterogeneous in that it contained individuals who exhibited overlapping but different impulsive-compulsive behaviours, with the majority of individuals having more than one impulsive-compulsive behaviour. Given the limitations on PET imaging, and in order to match the heterogeneity of the sample, and the presence of more than one impulsive-compulsive behaviour in the majority of individuals, we exposed patients to a variety of reward cues. Functional MRI studies show that sex and money reward cues activate the same region of ventral striatum within individuals (Sescousse *et al.*, 2010) and  $^{11}\text{C}$ -raclopride PET studies show that even abstract rewards like money lead to ventral striatal dopamine release (Koepp *et al.*, 1998; Zald *et al.*, 2004),

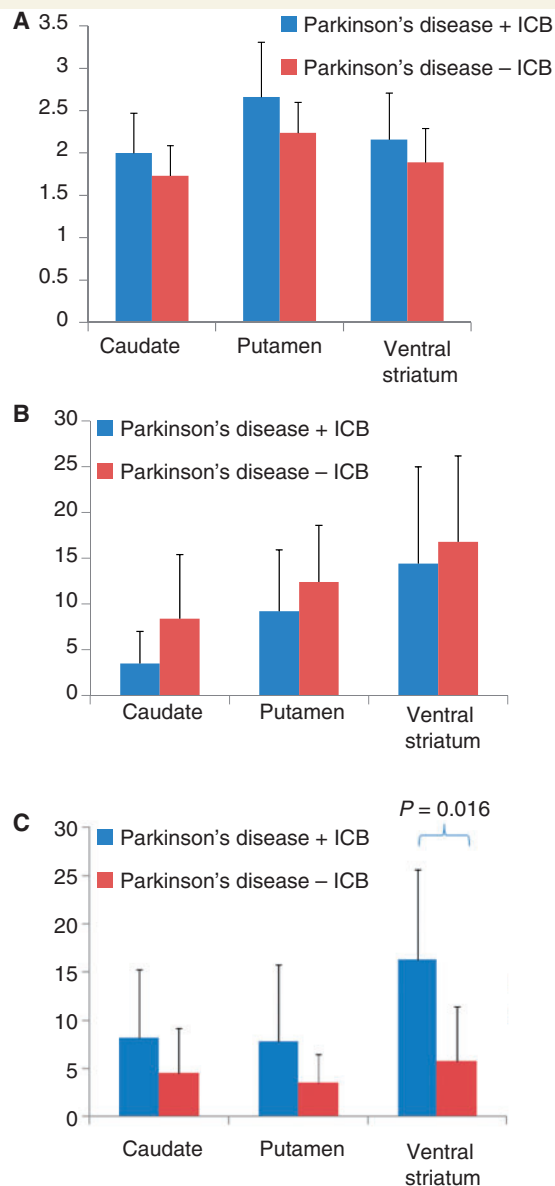

**Figure 1** (A) Mean baseline <sup>11</sup>C-raclopride binding potential in 'OFF-medication' scan with neutral images. (B) Mean percentage reduction in <sup>11</sup>C-raclopride binding potential following L-dopa challenge. (C) Mean percentage reduction in <sup>11</sup>C-raclopride binding potential following exposure to reward-related cues. Error bars show standard deviation. ICB = impulsive-compulsive behaviour.

consistent with a general dopaminergic incentive salience reward system. Further, behavioural studies in healthy volunteers show that activation of this general reward circuit leads to non-specific effects on reward processing, such that both food and sex cues can instigate money craving (Van den Bergh *et al.*, 2008). Similarly, pathological gamblers show enhanced cue reactivity not just to gambling cues, but other reward-related cues (Sodano and Wulfert, 2010). Our results could thus be taken to support a relatively non-specific exaggerated reward 'wanting' of individuals with Parkinson's disease and impulsive-compulsive

behaviour, presumably resulting from dopaminergic drug induced sensitization of mesolimbic systems in certain vulnerable individuals. This is consistent with observations that impulsive-compulsive behaviours frequently coexist in treated parkinsonian patients, and that increased or new substance addictions (tobacco, alcohol or other recreational drugs) have also been reported in patients with Parkinson's disease displaying impulsive-compulsive behaviours (Evans *et al.*, 2009). This is also consistent with observations in non-Parkinson's disease addicts that addictive tendencies frequently cluster; such as the frequent co-occurrence of alcohol use disorders, pathological gambling and nicotine dependence (Grant and Kim, 2003; Petry *et al.*, 2005; Kessler *et al.*, 2008).

However, there are limits to the extent of such broad motivational 'wanting'. In animals models, amphetamine sensitization can make drugs more 'wanted' than natural rewards for some individuals, but for others make food and/or sex more 'wanted' than drugs (Nocjar and Panksepp, 2002). Thus, dopaminergic drugs used to treat Parkinson's disease potentially 'sensitize' a range of appetitive or repetitive behaviours in vulnerable individuals—and the nature of the behaviour that becomes compulsive depends on individual and contextual factors. This variability probably explains why, in contrast to our previous findings (Evans *et al.*, 2006), we did not find increased L-dopa induced dopamine release in the ventral striatum in patients with Parkinson's disease and impulsive-compulsive behaviours exposed to neutral cues compared with patients with Parkinson's disease without impulsive-compulsive behaviours. However, our Parkinson's disease with impulsive-compulsive behaviour group contained only 4 of 11 patients (36%) with dopamine dysregulation syndrome whereas all the patients studied by Evans *et al.* (2006) had dopamine dysregulation syndrome. Although dopamine dysregulation syndrome is frequently associated with other impulsive-compulsive behaviours, (with all four patients with dopamine dysregulation syndrome exhibiting other impulsive-compulsive behaviours in this study), there is an important difference between dopamine dysregulation syndrome and other impulsive-compulsive behaviours. The defining feature of patients with dopamine dysregulation syndrome is their initial craving and subsequent addictive tendencies towards their dopaminergic therapy (O'Sullivan *et al.*, 2009). The results of our study, taken together with those of Nocjar and Panksepp (2002) may explain why the strong associations between L-dopa use and development of dopamine dysregulation syndrome are not seen in the development of other impulsive-compulsive behaviours (Giovannoni *et al.*, 2000). The use of dopamine agonists has been strongly implicated in impulsive-compulsive behaviours, but their use is not necessarily associated with a craving for the medication (Weintraub *et al.*, 2010). Future studies in larger cohorts of patients will need to explore the extent to which exaggerated ventral striatal-dopamine release might be limited to specific impulsive-compulsive behaviours and specific or general reward cues.

A recent study restricted to patients with Parkinson's disease and pathological gambling performing a simulated gambling task also found exaggerated ventral striatal dopamine release in pathological gambling versus control patients with Parkinson's disease. However, that task involved both reward and loss outcomes, and

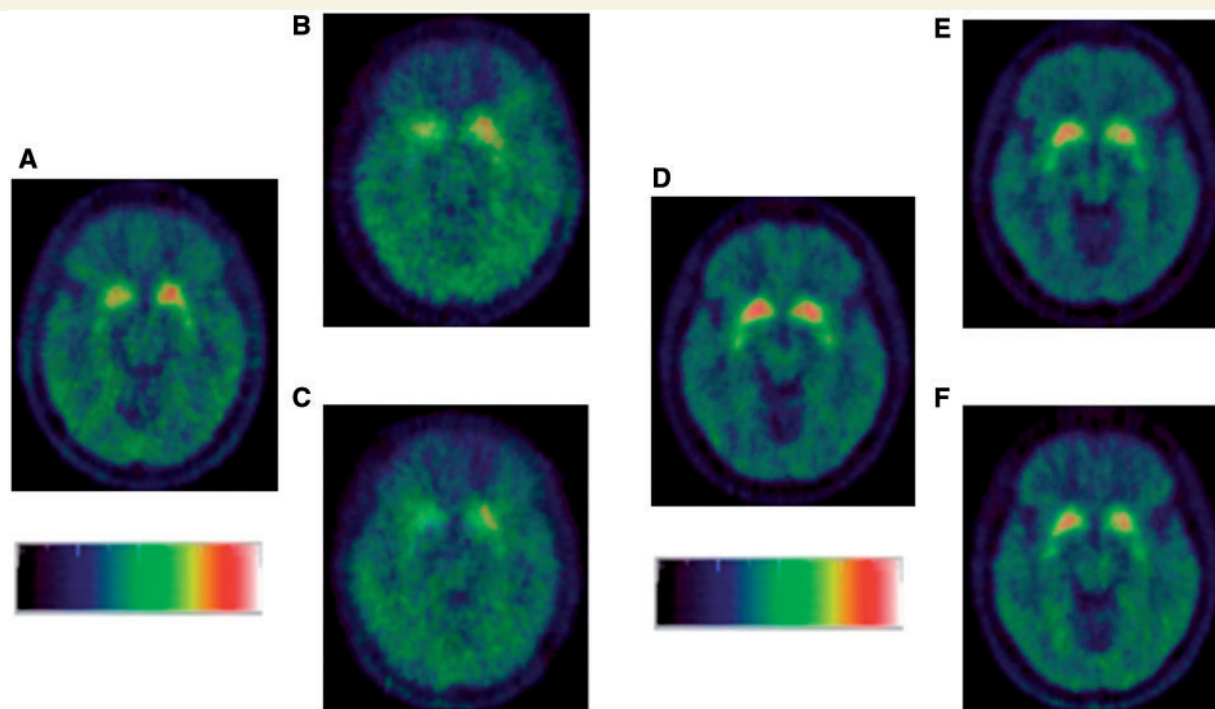

**Figure 2** Representative changes in  $^{11}\text{C}$ -raclopride binding potential between groups of patients with Parkinson's disease during scanning. (A) Parkinson's patient with ICB, off medication, neutral images. (B) Parkinson's patient with ICB, on medication, neutral images. (C) Parkinson's patient with ICB, on medication, reward images. (D) Parkinson's control patient, off medication, neutral images. (E) Parkinson's control patient, on medications, neutral images. (F) Parkinson's control patient, on medications, reward images.

a study in non-Parkinson's disease pathological gambling found that ventral striatal dopamine release was related to losing money in a simulated gambling task (Linnet *et al.*, 2010). Hence, our study is the first convincing demonstration of exaggerated responses to reward cues *per se* in individuals with Parkinson's disease and impulsive-compulsive behaviour. Four recent functional MRI and  $\text{H}_2^{15}\text{O}$  PET studies of Parkinson's disease and impulsive-compulsive behaviour have also been published although it is important to note that these techniques cannot measure dopamine release. Frosini *et al.* (2010) found increased ventral striatal activation to gambling-related cues on functional MRI in a small group of individuals with Parkinson's disease who did or did not exhibit pathological gambling, potentially consistent with our findings. Voon *et al.* (2010) studied a group of patients with Parkinson's disease who exhibited problem gambling and buying 'ON' and 'OFF' dopamine agonists, showing enhanced reward-related learning on dopamine accompanied by increased ventral striatal-related blood-oxygen level dependent activity to gain-specific outcomes (Voon *et al.*, 2010). While interpreted in terms of a role for dopamine in learning, the findings could be consistent with enhanced motivation rather than learning *per se* (Ranaldi *et al.*, 2009). Behavioural studies of reward-learning in individuals with Parkinson's disease and impulsive-compulsive behaviours have not been consistent (Djamshidian *et al.*, 2010; Housden *et al.*, 2010). van Eimeren *et al.* (2010) studied a group of individuals with Parkinson's disease that did or did not exhibit pathological gambling on a card selection task. They found that in individuals with Parkinson's

disease showing pathological gambling, dopamine medication resulted in a reduction of regional cerebral blood flow in lateral orbitofrontal cortex, rostral cingulate, amygdala and pallidum. However, in that study, medication status was not counterbalanced, response to financial reward *per se* (as opposed to task performance) was not examined and it was unclear whether there were performance differences between groups. Rao *et al.* (2010) reported reduced basal perfusion and diminished blood-oxygen level dependent activity during risk taking in a group of nine patients with Parkinson's disease and a variety of impulsive-compulsive behaviours (Rao *et al.*, 2010). Given that ventral striatal dopamine release to rewards is correlated with increased ventral striatal blood-oxygen level dependent response to rewards (Schott *et al.*, 2008), the findings of Rao *et al.* (2010) appear discrepant with ours. However, the difference may reflect fundamental differences in the processing of rewards versus risks in the ventral striatal in individuals with Parkinson's disease and impulsive-compulsive behaviours.

Some impulsive-compulsive behaviours, especially pathological gambling, have been labelled as behavioural addictions due to a presumed common underlying neurobiology (Grant, 2008). Volkow *et al.* (2009) have consistently shown that, during drug withdrawal, cocaine abusers show significant reductions in striatal dopamine D2 receptors and in amphetamine evoked dopamine release (Volkow *et al.*, 2009). They postulate that this hypodopaminergic state results in a decreased sensitivity to natural reinforcers perpetuating the use of the drug as a means to compensate for this deficit and contributing to the anhedonia and dysphoria

seen during withdrawal. Such a model has recently been applied to compulsive eating (Johnson and Kenny, 2010). Steeves *et al.* (2009) showed that patients with Parkinson's disease exhibiting pathological gambling had lower levels of baseline D2 binding than Parkinson's disease controls during a non-gambling card selection task (Steeves *et al.*, 2009). However, we found no difference between Parkinson's disease groups in the baseline  $^{11}\text{C}$ -raclopride  $\text{BP}_{\text{ND}}$  in the 'off-medication and neutral cues' scan. Our current findings are instead consistent with our previous results comparing dopamine dysregulation syndrome patients with Parkinson's disease controls (Evans *et al.*, 2006) and demonstrates that reduced D2 receptor availability is not a necessary precondition to developing impulsive or compulsive behaviours. A relative strength of this study compared with previous studies that have associated addiction with reduced striatal dopamine function is that our study controls for drug use between groups, whereas previous human studies on drug addiction have largely compared healthy (non-users) controls with drug addicts (Volkow *et al.*, 2009). Our results thus appear more consistent with an incentive sensitization, hyperdopaminergic account than a 'reward-deficiency' hypodopaminergic account. It is likely that impulsive-compulsive behaviours and addictions are heterogeneous conditions, and the relative contributions of hyper- versus hypodopaminergic states is an important topic for future work.

Previous cue reactivity studies of drug addiction have shown increased striatal dopamine release to drug cues. In some studies these occur in ventral striatum, consistent with our findings (Boileau *et al.*, 2007), but in others they are limited to dorsal striatum and these increases correlated with craving (Volkow *et al.*, 2006; Wong *et al.*, 2006). Since the dorsal striatum is implicated in habit and stimulus-response learning, this association has been thought to reflect the strengthening of habitual control over drug seeking/taking as addiction takes hold (Everitt and Robbins, 2005; Volkow *et al.*, 2009). However, recent work shows that dorsal striatum is also implicated in incentive salience processes, notably in focusing enhancement of 'wanting' onto most preferred cues (Difeliceantonio and Berridge, 2010), which might suggest a reconciliation of our findings with studies of cue-reactivity in drug addiction. We did find that sensation seeking positively correlated with per cent change in dopamine release in caudate and putamen to reward cues, but only in patients with Parkinson's disease and impulsive-compulsive behaviours. This may reflect an underlying risk factor for addiction (Sher *et al.*, 2000), but alternatively could reflect a result of a pathological process leading to increased impulsivity in some individuals (Ersche *et al.*, 2010).

In the current study, heightened cue induced ventral striatal dopamine release was not accompanied by enhanced self-reported food cravings, sexual desire, urge to gamble or medication craving in the Parkinson's disease with impulsive-compulsive behaviour group. According to the incentive sensitization hypothesis, incentive salience 'wanting' is not directly experienced in conscious awareness (Berridge and Robinson, 1995). Nonetheless, it causes the perception or representation of a stimulus to become attractive and sought after, potentially leading to impulsive reward pursuit. Additional cognitive processes are required to transform preconscious 'wanting' into subjective desire (Berridge and Robinson,

1995). Indeed, numerous contextual influences, including perceived availability of reward (Wertz and Sayette, 2001) influence subjective craving ratings, and such influences were likely at work here. In our previous study (Evans *et al.*, 2006) we found that sensitized L-dopa evoked ventral striatal dopamine release in the dopamine dysregulation syndrome was correlated with enhanced ratings of 'want more drug' obtained following a priming dose of L-dopa in a separate testing session. Studies of alcohol craving suggest that such drug primed, immediate ratings of craving may more closely reflect the incentive motivational properties of drug rewards (Schoenmakers *et al.*, 2008) reconciling the current findings with our earlier ones.

In conclusion, we show that patients with Parkinson's disease and impulsive-compulsive behaviours ON medication have increased ventral striatal dopamine responses to reward-related cues. This is the first study to look at ventral striatal dopamine release to cues in impulsive-compulsive behaviours, and also the first test of the 'reward spillover' account of impulsive-compulsive behaviours, providing an important link between neurobiological models of drug addiction and developing models of impulse control disorders. The findings are consistent with the hypothesis that, as a result of neural sensitization in vulnerable individuals, reward-related cues are attributed with pathological incentive salience, leading to compulsive pursuit. Our findings also potentially have important implications for decision making policies relating to advertising, which has a powerful impact and relies strongly on reward-related imagery. For instance, 40% of British young adult online gamblers cited advertising as a primary stimulus in encouraging them to start gambling online (Griffiths and Barnes, 2007). Our data raise the possibility that individuals with behavioural addictions are likely to undergo almost constant activations of their aberrant reward circuitry from the sort of reward-related cues that are typically employed in advertising (such as pop-up internet advertisements), thus potentially maintaining the behaviour and making it more difficult for abstinence to occur.

## Acknowledgements

The study sponsors had no role in study design; in the collection, analysis and interpretation of data or in the writing of the report. We are most grateful to all the patients and their partners who participated in this study.

## Funding

Parkinson's UK and the Reta Lila Weston Institute for Neurological Studies; Wales Institute of Cognitive Neuroscience (WICN to A.D.L.).

## References

- Berridge KC. The debate over dopamine's role in reward: the case for incentive salience. *Psychopharmacology* 2007; 191: 391–431.
- Berridge KC, Robinson TE. The mind of an addicted brain: neural sensitization of wanting versus liking. *Curr Dir Psychol Sci* 1995; 4: 71–6.

- Berridge KC, Robinson TE, Aldridge JW. Dissecting components of reward: 'liking', 'wanting', and learning. *Curr Opin Pharmacol* 2009; 9: 65–73.
- Boileau I, Dagher A, Leyton M, Welfeld K, Booij L, Diksic M, et al. Conditioned dopamine release in humans: a positron emission tomography [<sup>11</sup>C]raclopride study with amphetamine. *J Neurosci* 2007; 27: 3998–4003.
- Brooks DJ, Piccini P. Imaging in Parkinson's disease: the role of monoamines in behavior. *Biol Psychiatr* 2006; 59: 908–18.
- Carter BL, Tiffany ST. Meta-analysis of cue-reactivity in addiction research. *Addiction* 1999; 94: 327–40.
- Crombag HS, Robinson TE. Drug, environment, brain and behavior. *Curr Dir Psychol Sci* 2004; 13: 107–11.
- Cyders MA, Smith GT. Clarifying the role of personality dispositions in risk for increased gambling behavior. *Pers Individ Dif* 2008; 45: 503–8.
- Difeliceantonio AG, Berridge KC. Neostriatal sites of mu opioid stimulation enhance CS motivational magnets. Abstract. San Diego, CA: Society For Neuroscience; 2010.
- Djamshidian A, Jha A, O'Sullivan SS, Silveira-Moriya L, Jacobson C, Brown P, et al. Risk and learning in impulsive and nonimpulsive patients with Parkinson's disease. *Mov Disord* 2010; 25: 2203–10.
- Ersche KD, Turton AJ, Pradhan S, Bullmore ET, Robbins TW. Drug addiction endophenotypes: impulsive versus sensation-seeking personality traits. *Biol Psychiatr* 2010; 68: 770–3.
- Evans AH, Katzenschlager R, Paviour D, O'Sullivan JD, Appel S, Lawrence AD, et al. Punding in Parkinson's disease: its relation to the dopamine dysregulation syndrome. *Mov Disord* 2004; 19: 397–405.
- Evans AH, Pavese N, Lawrence AD, Tai YF, Appel S, Doder M, et al. Compulsive drug use linked to sensitized ventral striatal dopamine transmission. *Ann Neurol* 2006; 59: 852–8.
- Evans AH, Strafella AP, Weintraub D, Stacy M. Impulsive and compulsive behaviors in Parkinson's disease. *Mov Disord* 2009; 24: 1561–70.
- Everitt BJ, Robbins TW. Neural systems of reinforcement for drug addiction: from actions to habits to compulsion. *Nat Neurosci* 2005; 8: 1481–9.
- Fiorino DF, Phillips AG. Facilitation of sexual behavior and enhanced dopamine efflux in the nucleus accumbens of male rats after D-amphetamine-induced behavioral sensitization. *J Neurosci* 1999; 19: 456–63.
- Frosini D, Pesaresi I, Cosottini M, Belmonte G, Rossi C, Dell'Osso L, et al. Parkinson's disease and pathological gambling: results from a functional MRI study. *Mov Disord* 2010; 25: 2449–53.
- Gallagher DA, O'Sullivan SS, Evans AH, Lees AJ, Schrag A. Pathological gambling in Parkinson's disease: risk factors and differences from dopamine dysregulation. An analysis of published case series. *Mov Disord* 2007; 22: 1757–63.
- Giovannoni G, O'Sullivan JD, Turner K, Manson AJ, Lees AJ. Hedonic homeostatic dysregulation in patients with Parkinson's disease on dopamine replacement therapies. *J Neurol Neurosurg Psychiatr* 2000; 68: 423–8.
- Grant JE. Impulse control disorders. New York: Norton; 2008.
- Grant JE, Kim SW. Comorbidity of impulse control disorders in pathological gamblers. *Acta Psychiatr Scand* 2003; 108: 203–7.
- Griffiths M, Barnes A. Internet gambling: an online empirical study among student gamblers. *Int J Ment Health Addict* 2007; 6: 194–204.
- Gunn RN, Lammertsma AA, Hume SP, Cunningham VJ. Parametric imaging of ligand-receptor binding in PET using a simplified reference region model. *Neuroimage* 1997; 6: 279–87.
- Housden CR, O'Sullivan SS, Joyce EM, Lees AJ, Roiser JP. Intact reward learning but elevated delay discounting in Parkinson's disease patients with impulsive-compulsive spectrum behaviors. *Neuropsychopharmacology* 2010; 35: 2155–64.
- Hughes AJ, Daniel SE, Kilford L, Lees AJ. Accuracy of clinical diagnosis of idiopathic Parkinson's disease: a clinico-pathological study of 100 cases. *J Neurol Neurosurg Psychiatr* 1992; 55: 181–4.
- Johnson PM, Kenny PJ. Dopamine D2 receptors in addiction-like reward dysfunction and compulsive eating in obese rats. *Nat Neurosci* 2010; 13: 635–41.
- Kessler RC, Hwang I, LaBrie R, Petukhova M, Sampson NA, Winters KC, et al. DSM-IV pathological gambling in the National Comorbidity Survey Replication. *Psychol Med* 2008; 38: 1351–60.
- Koepp MJ, Gunn RN, Lawrence AD, Cunningham VJ, Dagher A, Jones T, et al. Evidence for striatal dopamine release during a video game. *Nature* 1998; 393: 266–8.
- Lammertsma AA, Hume SP. Simplified reference tissue model for PET receptor studies. *Neuroimage* 1996; 4: 153–8.
- Lang PJ, Bradley MM, Cuthbert BN. International affective picture system (IAPS): Affective ratings of pictures and instruction manual. Technical Report A-8. Gainesville, FL, USA: University of Florida; 2008.
- Lawrence AD, Evans AH, Lees AJ. Compulsive use of dopamine replacement therapy in Parkinson's disease: reward systems gone awry? *Lancet Neurol* 2003; 2: 595–604.
- Lejoyeux M, Feuche N, Loi S, Solomon J, Ades J. Impulse-control disorders in alcoholics are related to sensation seeking and not to impulsivity. *Psychiatr Res* 1998; 81: 149–55.
- Linnert J, Peterson E, Doudet DJ, Gjedde A, Moller A. Dopamine release in ventral striatum of pathological gamblers losing money. *Acta Psychiatr Scand* 2010; 122: 326–33.
- Nocjar C, Panksepp J. Chronic intermittent amphetamine pretreatment enhances future appetitive behavior for drug- and natural-reward: interaction with environmental variables. *Behav Brain Res* 2002; 128: 189–203.
- O'Sullivan SS, Evans AH, Lees AJ. Dopamine dysregulation syndrome: an overview of its epidemiology, mechanisms and management. *CNS Drugs* 2009; 23: 157–70.
- Petry NM, Stinson FS, Grant BF. Comorbidity of DSM-IV pathological gambling and other psychiatric disorders: results from the National Epidemiologic Survey on Alcohol and Related Conditions. *J Clin Psychiatr* 2005; 66: 564–74.
- Ranaldi R, Egan J, Kest K, Fein M, Delamater AR. Repeated heroin in rats produces locomotor sensitization and enhances appetitive Pavlovian and instrumental learning involving food reward. *Pharmacol Biochem Behav* 2009; 91: 351–7.
- Rao H, Mamikonyan E, Detre JA, Siderowf AD, Stern MB, Potenza MN, et al. Decreased ventral striatal activity with impulse control disorders in Parkinson's disease. *Mov Disord* 2010; 25: 1660–9.
- Robinson TE, Berridge KC. The neural basis of drug craving: an incentive-sensitization theory of addiction. *Brain Res Brain Res Rev* 1993; 18: 247–91.
- Robinson TE, Berridge KC. Review. The incentive sensitization theory of addiction: some current issues. *Philos Trans R Soc Lond B Biol Sci* 2008; 363: 3137–46.
- Schoenmakers T, Wiers RW, Field M. Effects of a low dose of alcohol on cognitive biases and craving in heavy drinkers. *Psychopharmacology* 2008; 197: 169–78.
- Schott BH, Minuzzi L, Krebs RM, Elmenhorst D, Lang M, Winz OH, et al. Mesolimbic functional magnetic resonance imaging activations during reward anticipation correlate with reward-related ventral striatal dopamine release. *J Neurosci* 2008; 28: 14311–9.
- Sescousse G, Redoute J, Dreher JC. The architecture of reward value coding in the human orbitofrontal cortex. *J Neurosci* 2010; 30: 13095–104.
- Sher KJ, Bartholow BD, Wood MD. Personality and substance use disorders: a prospective study. *J Consult Clin Psychol* 2000; 68: 818–29.
- Sobik L, Hutchison K, Craighead L. Cue-elicited craving for food: a fresh approach to the study of binge eating. *Appetite* 2005; 44: 253–61.
- Sodano R, Wulfer E. Cue reactivity in active pathological, abstinent pathological, and regular gamblers. *J Gambl Stud* 2010; 26: 53–65.
- Steeves TD, Miyasaki J, Zurowski M, Lang AE, Pellecchia G, Van Eimeren T, et al. Increased striatal dopamine release in Parkinsonian

- patients with pathological gambling: a [11C] raclopride PET study. *Brain* 2009; 132: 1376–85.
- Stephenson MT, Hoyle RH, Palmgreen P, Slater MD. Brief measures of sensation seeking for screening and large-scale surveys. *Drug Alcohol Depend* 2003; 72: 279–86.
- Van den Bergh B, Dewitte S, Warlop L. Binkies instigate generalized impatience in intertemporal choice. *J Consum Res* 2008; 35: 85–97.
- van Eimeren T, Pellecchia G, Cilia R, Ballanger B, Steeves TD, Houle S, et al. Drug-induced deactivation of inhibitory networks predicts pathological gambling in PD. *Neurology* 2010; 75: 1711–6.
- Volkow ND, Fowler JS, Wang GJ, Baler R, Telang F. Imaging dopamine's role in drug abuse and addiction. *Neuropharmacology* 2009; 56 (Suppl. 1): 3–8.
- Volkow ND, Wang GJ, Telang F, Fowler JS, Logan J, Childress AR, et al. Cocaine cues and dopamine in dorsal striatum: mechanism of craving in cocaine addiction. *J Neurosci* 2006; 26: 6583–8.
- Voon V, Fox SH. Medication-related impulse control and repetitive behaviors in Parkinson disease. *Arch Neurol* 2007; 64: 1089–96.
- Voon V, Pessiglione M, Brezing C, Gallea C, Fernandez HH, Dolan RJ, et al. Mechanisms underlying dopamine-mediated reward bias in compulsive behaviors. *Neuron* 2010; 65: 135–42.
- Watson CC, Newport D. M.E.C. A single scatter simulation technique for scatter correction in three-dimensional PET. In: Grangeat P, Amans JL, editors. *Three-dimensional image reconstruction in radiology and nuclear medicine*. Dordrecht: Kluwer; 1996. p. 255–68.
- Weintraub D, Koester J, Potenza MN, Siderowf AD, Stacy M, Voon V, et al. Impulse control disorders in Parkinson disease: a cross-sectional study of 3090 patients. *Arch Neurol* 2010; 67: 589–95.
- Wertz JM, Sayette MA. A review of the effects of perceived drug use opportunity on self-reported urge. *Exp Clin Psychopharmacol* 2001; 9: 3–13.
- West R, Ussher M. Is the ten-item Questionnaire of Smoking Urges (QSU-brief) more sensitive to abstinence than shorter craving measures? *Psychopharmacology* 2010; 208: 427–32.
- Wong DF, Kuwabara H, Schretlen DJ, Bonson KR, Zhou Y, Nandi A, et al. Increased occupancy of dopamine receptors in human striatum during cue-elicited cocaine craving. *Neuropsychopharmacology* 2006; 31: 2716–27.
- Wyvell CL, Berridge KC. Incentive sensitization by previous amphetamine exposure: increased cue-triggered “wanting” for sucrose reward. *J Neurosci* 2001; 21: 7831–40.
- Yip SW, White MA, Grilo CM, Potenza MN. An exploratory study of clinical measures associated with subsyndromal pathological gambling in patients with binge eating disorder. *J Gambl Stud* 2010, Advance Access published on June 25, 2010, doi: 10.1007/s10899-010-9207-z.
- Youn S, Faber RJ. Impulsive buying: its relation to personality traits and cues. In: Hoch SJ, Meyer RJ, editors. *Advances in Consumer Research*. Vol. 27. Provo, UT: Association for Consumer Research; 2000. p. 179–85.
- Zald DH, Boileau I, El-Dearedy W, Gunn R, McGlone F, Dichter GS, et al. Dopamine transmission in the human striatum during monetary reward tasks. *J Neurosci* 2004; 24: 4105–12.
